# Supplementary material
Source: PubMed Central journal article supplement (PMC6615671)
Supplement: supp_RA119.007762_143404_2_supp_333017_prn2tv.pdf [file supp_RA119.007762_143404_2_supp_333017_prn2tv.pdf]

Supporting Information

**Membrane potential is vital for rapid permeabilization of plasma membranes and lipid bilayers by the antimicrobial peptide lactoferricin B**

Farzana Hossain, Md. Mizanur Rahman Moghal, Md. Zahidul Islam, Md. Moniruzzaman, and Masahito Yamazaki

Figure S1

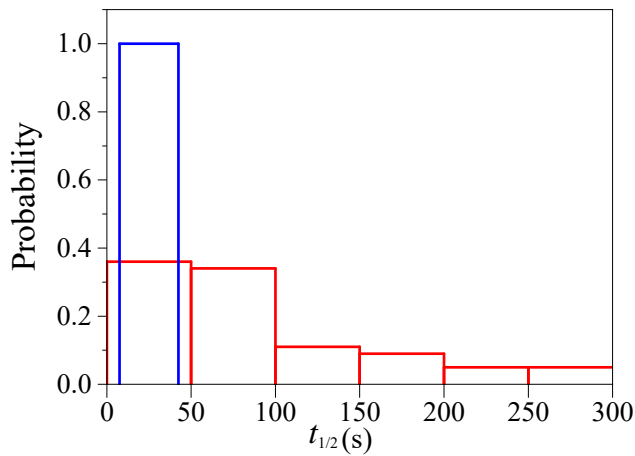

**Figure S1.** The rate of LfcinB-induced leakage of calcein from single cells interacting with 3.0  $\mu$ M LfcinB. The distribution of half-time (i.e.,  $t_{1/2}$ ) of leakage of calcein in all the examined cells is shown using a histogram. Blue bar and red bar indicate the probability of each range of  $t_{1/2}$  in septating cells and in non-septating cells, respectively.

## 1. Preparation methods of spheroplasts of *E. coli* cells

An *E. coli* suspension was subcultured on nutrient agar plates at 37 °C for overnight to get single colonies. A single colony of bacteria was then grown in Nutrient Broth medium for 10 to 12 h at 37 °C in an incubator shaker (MBR-032P. TAITEC, Koshigaya, Japan) at 200 rpm. After diluting this culture 10 times (final volume: 5 mL), 60 µL of 5 mg/mL cephalixin was added to this culture (final cephalixin concentration; 60 µg/mL). Then, the culture was shaken at 42 °C for 10–12 h, producing single-cell filaments with 50–150 µm length, which were confirmed using CLSM. We obtained these filaments as a pellet by centrifugation of the above suspension at 1500×g for 5 min, then rinsed the pellet (without resuspension) by gentle addition of 1 mL of 0.8 M sucrose, and incubated it at room temperature for 1 min. The supernatant was removed using a Pasteur pipette and resuspended in 2.5 mL of 0.8 M sucrose. We added the following reagents to this suspension in order; 150 µL of 1 M Tris-HCl (pH 7.8), 120 µL of 5 mg/mL lysozyme, 30 µL of 5 mg/mL DNase I, and 120 µL of 0.125 M EDTA-Na (pH 8.0), and then incubated it at room temperature for 8–10 min. To stop the reaction, we added 1 mL of a solution containing 20 mM MgCl<sub>2</sub>, 0.7 M sucrose, and 10 mM Tris-HCl (pH 7.8) over 1 min while stirring, and incubated it at room temperature for 4 min. We layered 2 mL of this suspension over 4 mL buffer (10 mM Tris-HCl (pH 7.8) containing 1.5 mM KCl, 48.5 mM NaCl, and 0.73 M sucrose (or 10 mM Tris-HCl (pH 7.8) containing 10 mM MgCl<sub>2</sub> and 0.8 M sucrose (1,2)), and then concentrated it using Vivaspin 6 (100 kDa MWCO, GE Healthcare, Buckinghamshire, UK) by centrifugation at 6000×g for 20 min to obtain ~1.0 mL suspension of the spheroplasts. We repeated this purification procedure. 4 mL of a new buffer (10 mM Tris-HCl (pH 7.8) containing 1.5 mM KCl, 48.5 mM NaCl, and 0.73 M sucrose (or 10 mM 10 mM Tris-HCl (pH 7.8) containing 10 mM MgCl<sub>2</sub> and 0.8 M sucrose (1,2)) was added to this ~1.0 mL suspension and mixed, and then concentrated it using Vivaspin 6 under the same condition to obtain 1 mL suspension of the spheroplasts.

## References

1. Martinac, B., Buechner, M., Delcour, A. H., Adler, J., and Kung, C. (1987) Pressure-sensitive ion channel in *Escherichia coli*. *Proc. Natl. Acad. Sci. U. S. A.* 84, 2297-2301.
2. Wei, L., LaBouyer, M. A., Darling, L. E. O., and Elmore, D. E. (2016) Bacterial spheroplasts as a model for visualizing membrane translocation of antimicrobial peptides. *Antimicrobial Agents Chemo.* 60, 6350-6352.

Figure S2

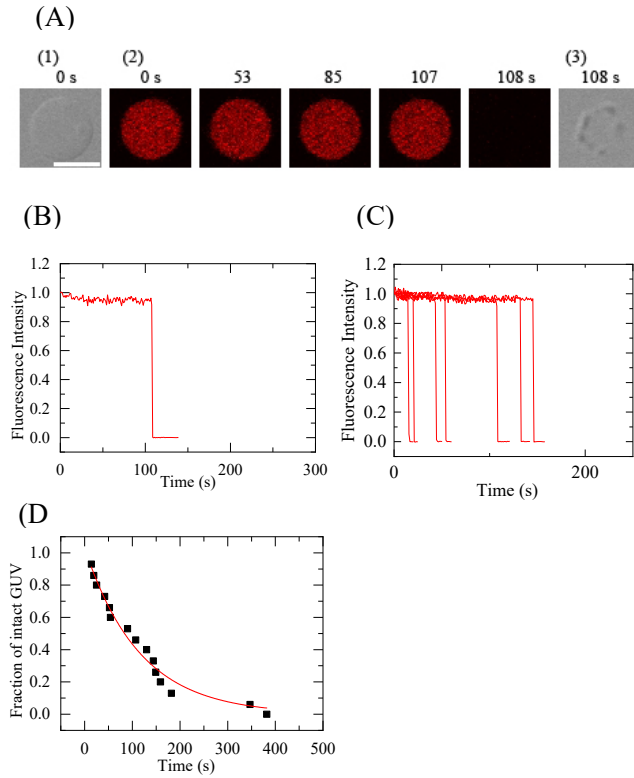

**Figure S2.** LfcinB-induced leakage of AF647 from single *E. coli*-lipid-GUVs with  $\Delta\varphi = -86$  mV. (A) Leakage of AF647 from single *E. coli*-lipid-GUVs induced by 20  $\mu\text{M}$  LfcinB in buffer at 25  $^{\circ}\text{C}$ . CLSM images (2) show that the AF647 concentration inside the GUV rapidly decreased after some lag time of the addition of LfcinB. The numbers above each image show the time in seconds after the LfcinB addition was started. Also shown are DIC images of the GUV at time 0 (1) and 108 s (3). The bar corresponds to 20  $\mu\text{m}$ . (B) Time course of the change in the normalized FI of the GUV shown in (A). We obtained the normalized FI of a GUV as the ratio of the FI at time  $t$  to that before the addition of LfcinB. (C) Other examples of the time course of the change in the normalized FI of several "single GUVs" under the same conditions as in (A). Each curve corresponds to the time course of each GUV. (D) Time course of fraction of intact GUV,  $P_{\text{intact}}$ , among all examined GUVs. The solid line represents the best fit curve of eq. 1.
